# Supplementary material
Source: HighWire-hosted journal article supplement (https://bmjopen.bmj.com/content/13/5/e062804)
Supplement: inline-supplementary-material-3 [file inline-supplementary-material-3.pdf]

**Supplementary Table 3 Exposure to MTV Shuga and consistent condom use in the nested cohort of AGYW aged 13-22 (n=2184)**

|                                            | Unadjusted |           | Shuga adjusted |           | p-value | Adjusted-All |           | p-value |
|--------------------------------------------|------------|-----------|----------------|-----------|---------|--------------|-----------|---------|
|                                            | OR         | 95%CI     | OR             | 95%CI     |         | OR           | 95%CI     |         |
| <b>Ever watched MTV Shuga, 2018/19</b>     |            |           |                |           |         |              |           |         |
| No                                         | 1          |           |                |           |         | 1            |           |         |
| Yes                                        | 1.84       | 1.22-2.78 |                |           |         | 1.9          | 1.24-2.93 | 0.003   |
| <b>Age</b>                                 | 0.94       | 0.86-1.01 | 0.94           | 0.87-1.02 | 0.157   | 1            | 0.91-1.10 | 0.984   |
| <b>Currently in school</b>                 |            |           |                |           |         |              |           |         |
| No                                         | 1          |           | 1              |           |         | 1            |           |         |
| Yes                                        | 1.76       | 1.22-2.53 | 1.73           | 1.20-2.49 | 0.003   | 1.78         | 1.15-2.76 | 0.01    |
| <b>Socio-economic status, 2018</b>         |            |           |                |           |         |              |           |         |
| Low                                        | 1          |           | 1              |           |         | 1            |           |         |
| Middle                                     | 1.01       | 0.60-1.70 | 0.97           | 0.58-1.63 |         | 0.98         | 0.58-1.67 |         |
| High                                       | 0.87       | 0.52-1.47 | 0.8            | 0.47-1.36 | 0.552   | 0.86         | 0.50-1.48 | 0.753   |
| <b>Urban or rural</b>                      |            |           |                |           |         |              |           |         |
| Rural                                      | 1          |           | 1              |           |         | 1            |           |         |
| Peri-urban/urban                           | 0.7        | 0.48-1.02 | 0.67           | 0.46-0.97 | 0.035   | 0.71         | 0.48-1.05 | 0.088   |
| <b>Invited or received DREAMS, 2017/18</b> |            |           |                |           |         |              |           |         |
| No                                         | 1          |           | 1              |           |         | 1            |           |         |
| Yes                                        | 1.13       | 0.81-1.59 | 1.13           | 0.80-1.59 | 0.486   | 0.97         | 0.67-1.40 | 0.875   |
