# Supplementary material
Source: HighWire-hosted journal article supplement (https://bmjopen.bmj.com/content/13/5/e062804)
Supplement: inline-supplementary-material-6 [file inline-supplementary-material-6.pdf]

Supplementary Table 6 Estimated causal effect of MTV Shuga on HSV-2 incidence, overall and by age group

| Estimated causal effect of MTV Shuga on HSV-2 incidence, overall and by age group |                                     |                                 |               |                                      |               |                                  |               |                                   |             |                             |             |
|-----------------------------------------------------------------------------------|-------------------------------------|---------------------------------|---------------|--------------------------------------|---------------|----------------------------------|---------------|-----------------------------------|-------------|-----------------------------|-------------|
|                                                                                   | % Outcome in total study population | Estimated % Outcome if no Shuga | 95% CI        | Estimated % Outcome if all get Shuga | 95% CI        | Risk Difference (%; PS adjusted) | 95% CI        | Prevalence Ratio (%; PS adjusted) | 95% CI      | Odds Ratio (%; PS adjusted) | 95% CI      |
| <b>PS adjustment: Primary results</b>                                             |                                     |                                 |               |                                      |               |                                  |               |                                   |             |                             |             |
| Overall                                                                           | 17.3                                | 17.2                            | 14.71 - 19.67 | 18.0                                 | 14.51 - 22.32 | 0.80                             | -3.24 - 5.71  | 1.05                              | 0.82 - 1.36 | 1.06                        | 0.79 - 1.46 |
| 13-17 Years                                                                       | 13.2                                | 12.4                            | 9.85 - 15.16  | 15.7                                 | 11.63 - 20.26 | 3.34                             | -1.60 - 8.25  | 1.27                              | 0.89 - 1.79 | 1.32                        | 0.87 - 1.98 |
| 18-22 Years                                                                       | 24.3                                | 25.8                            | 21.01 - 30.74 | 22.0                                 | 15.19 - 30.17 | -3.76                            | -11.92 - 5.68 | 0.85                              | 0.59 - 1.24 | 0.81                        | 0.51 - 1.34 |
| <b>Sensitivity analyses</b>                                                       |                                     |                                 |               |                                      |               |                                  |               |                                   |             |                             |             |
| <u>Regression under counterfactual framework</u>                                  |                                     |                                 |               |                                      |               |                                  |               |                                   |             |                             |             |
| Overall                                                                           | 17.3                                | 17.2                            | 14.74 - 19.66 | 17.8                                 | 14.50 - 22.08 | 0.65                             | -3.42 - 5.72  | 1.04                              | 0.82 - 1.36 | 1.05                        | 0.78 - 1.46 |
| 13-17 Years                                                                       | 13.2                                | 12.42                           | 9.86 - 15.21  | 15.9                                 | 11.85 - 20.49 | 3.47                             | -1.54 - 8.63  | 1.28                              | 0.89 - 1.80 | 1.33                        | 0.88 - 1.99 |
| 18-22 Years                                                                       | 24.3                                | 25.7                            | 20.78 - 30.63 | 21.3                                 | 14.88 - 28.28 | -4.42                            | -12.28 - 4.95 | 0.83                              | 0.57 - 1.22 | 0.78                        | 0.48 - 1.31 |
| <u>PS stratification</u>                                                          |                                     |                                 |               |                                      |               |                                  |               |                                   |             |                             |             |
| Overall                                                                           | 17.3                                | 17.1                            | 14.68 - 19.68 | 17.9                                 | 14.53 - 22.13 | 0.80                             | -3.21 - 5.52  | 1.09                              | 0.84 - 1.40 | 1.11                        | 0.82 - 1.51 |
| <u>PS weighting</u>                                                               |                                     |                                 |               |                                      |               |                                  |               |                                   |             |                             |             |

|         |      |       |                  |       |                  |      |                 |      |                |      |                |
|---------|------|-------|------------------|-------|------------------|------|-----------------|------|----------------|------|----------------|
| Overall | 17.3 | 17.08 | 14.74 -<br>19.48 | 17.22 | 13.99 -<br>21.10 | 0.13 | -3.76 -<br>4.63 | 1.01 | 0.79 -<br>1.30 | 1.01 | 0.76 -<br>1.37 |
|---------|------|-------|------------------|-------|------------------|------|-----------------|------|----------------|------|----------------|
